# Supplementary material
Source: PubMed Central journal article supplement (PMC6459111)
Supplement: jama-321-1380-s002.pdf [file jama-321-1380-s002.pdf]

## Supplementary Online Content

Traeger MW, Cornelisse VJ, Asselin J, Price B, Roth NJ, Willcox J, et al. Association of HIV preexposure prophylaxis with incidence of sexually transmitted infections among individuals at high risk of HIV infection. *JAMA*. doi:10.1001/jama.2019.2947

|                                                                                                                                                             |   |
|-------------------------------------------------------------------------------------------------------------------------------------------------------------|---|
| <b>eMethods.</b> PrEPX Behavioural Eligibility Criteria                                                                                                     | 2 |
| <b>eTable 1.</b> Self-Reported Gender, Sex Assigned at Birth, and Sexuality Among Included Participants (N=2981)                                            | 3 |
| <b>eTable 2.</b> Characteristics at Enrollment of Included vs Not Included PrEPX Victoria Participants                                                      | 4 |
| <b>eTable 3.</b> Distribution of Participants and STI Diagnoses by Number of Infections per Participant During Follow-up                                    | 5 |
| <b>eTable 4.</b> Characteristics at Enrollment Among Participants With Preenrollment Testing Data vs Participants With no Preenrolment Testing Data         | 6 |
| <b>eTable 5.</b> Characteristics at Enrollment of PrEP-Experienced vs PrEP-Naive Participants                                                               | 7 |
| <b>eTable 6.</b> Number of Tests Performed and Positive Tests Among Participants With Preenrollment Testing Data Before and During Study Follow-up (n=1378) | 8 |
| <b>eTable 7.</b> Incidence of Sexually Transmitted Infections Before and After Enrollment Among All Participants With Preenrollment Testing Data (n=1378)   | 9 |

This supplementary material has been provided by the authors to give readers additional information about their work.

## **Authors**

Michael W. Traeger<sup>#</sup>, Vincent J. Cornelisse, Jason Asselin, Brian Price, Norman J. Roth, Jeff Willcox, Ban Kiem Tee, Christopher K. Fairley, Christina C. Chang, Jude Armishaw, Olga Vujovic, Matthew Penn, Pauline Cundill, George Forgan-Smith, John Gall, Claire Pickett, Luxi Lal, B.Pharm, Anne Mak, Tim D. Spelman, Long Nguyen, Dean A. Murphy, Kathleen E. Ryan, Carol El-Hayek, Michael West, Simon Ruth, Colin Batrouney, John T. Lockwood, Jennifer F. Hoy, Margaret E. Hellard, Mark A. Stoové\*, Edwina J. Wright\*, *on behalf of the PrEPX Study Team.*

#Corresponding author

\*Co-senior authors

## **eMethods 1. PrEPX Behavioural Eligibility Criteria**

The study participant is likely to have multiple events of condomless anal intercourse (CLAI), with or without sharing intravenous drug use (IDU), in the next 3 months (indicating sustained risk) AND has any of the following:

1. Is a regular sexual partner of an HIV-infected male partner with whom condoms were not consistently used in the last 3 months (HIV positive partner is not on treatment and/or has detectable HIV viral load)
2. At least one episode of receptive CLAI with any casual HIV-infected male partner or a male partner of unknown HIV status in the last 3 months
3. A diagnosis of rectal gonorrhoea, chlamydia and/or syphilis during the last 3 months or at screening
4. Has used methamphetamine in the last 3 months
5. Has had more than one episode of anal intercourse in the last 3 months when proper condom use was not achieved (e.g., condoms slipped off or broke)
6. The study participant reports more than one episode of insertive CLAI in the last 3 months where the serostatus of their partner was not known, or the partner was HIV positive and not on antiretroviral treatment.

**eTable 1. Self-Reported Gender, Sex Assigned at Birth, and Sexuality Among Included Participants (N=2981)**

| Self-reported gender identity at enrolment | Sex assigned at birth |          |
|--------------------------------------------|-----------------------|----------|
|                                            | Male                  | Female   |
| <b>Male</b>                                | <b>2943</b>           | <b>4</b> |
| <b>Female</b>                              | <b>5</b>              | <b>1</b> |
| <b>Transgender female</b>                  | <b>4</b>              | <b>0</b> |
| <b>Transgender male</b>                    | <b>2</b>              | <b>9</b> |
| <b>Non-binary / Gender fluid</b>           | <b>1</b>              | <b>0</b> |
| <b>Intersex</b>                            | <b>9</b>              | <b>2</b> |
| <b>Agender</b>                             | <b>1</b>              | <b>0</b> |

| Sexuality            | Gender              |                       |                           |
|----------------------|---------------------|-----------------------|---------------------------|
|                      | Male (cis or trans) | Female (cis or trans) | Non-binary / Gender fluid |
| <b>Homosexual</b>    | <b>2813</b>         | <b>0</b>              | <b>4</b>                  |
| <b>Bisexual</b>      | <b>123</b>          | <b>2</b>              | <b>0</b>                  |
| <b>Heterosexual</b>  | <b>3</b>            | <b>6</b>              | <b>0</b>                  |
| <b>Non-specified</b> | <b>19</b>           | <b>2</b>              | <b>9</b>                  |

**eTable 2. Characteristics at Enrollment of Included vs Not Included PrEPX Victoria Participants**

|                                                                                                                                                                  | <b>Included in STI analyses (n=2,981)</b> | <b>Not included in STI analyses (n=1,294)</b> | <b>P Value*</b>  |
|------------------------------------------------------------------------------------------------------------------------------------------------------------------|-------------------------------------------|-----------------------------------------------|------------------|
| <b>Age (mean years)</b>                                                                                                                                          | 36.2                                      | 35.1                                          | <b>&lt;0.001</b> |
| <b>Aboriginal or Torres Strait Islander n(%)</b>                                                                                                                 | 8 (0.3)                                   | 6 (0.5)                                       | 0.300            |
| <b>Injection drug use at enrolment n(%)</b>                                                                                                                      | 148 (5.0)                                 | 48 (3.7)                                      | 0.076            |
| <b>Enrolment risk criteria. In the last 3 months; n(%)</b>                                                                                                       |                                           |                                               |                  |
| A regular sexual partner who is an HIV-infected man (not on treatment and/or with detectable viral load), with whom condoms were not consistently used           | 129 (4.3)                                 | 44 (3.4)                                      | 0.166            |
| Any receptive CLAI (condomless anal intercourse) with a casual male partner of HIV-positive or unknown status                                                    | 1429 (47.9)                               | 623 (48.4)                                    | 0.795            |
| Been diagnosed with rectal gonorrhoea, rectal chlamydia or infectious syphilis                                                                                   | 484 (16.2)                                | 190 (14.8)                                    | 0.222            |
| Used methamphetamines                                                                                                                                            | 412 (13.8)                                | 100 (7.8)                                     | <b>&lt;0.001</b> |
| More than one episode of anal intercourse when correct and consistent condom use was not achieved (e.g., condom slipped off or broke)                            | 913 (30.6)                                | 375 (29.1)                                    | 0.323            |
| More than one episode of insertive CLAI where the serostatus of their partner was not known, or the partner was HIV positive and not on antiretroviral treatment | 1041 (34.9)                               | 438 (34.0)                                    | 0.564            |

**\*P Value is from two-sided t-test of means for age and test of proportions for all other characteristics.**

**eTable 3. Distribution of Participants and STI Diagnoses by Number of Infections per Participant During follow-up**

|         | Number of participants | Number of STI diagnoses | Proportion of participants (N=2,981) | Proportion of all STIs diagnosed (N=2,928) |
|---------|------------------------|-------------------------|--------------------------------------|--------------------------------------------|
| No STIs | 1554                   | 0                       | 52.1                                 | 0.0                                        |
| 1 STI   | 691                    | 691                     | 23.2                                 | 23.6                                       |
| 2 STIs  | 344                    | 688                     | 11.5                                 | 23.5                                       |
| 3 STIs  | 203                    | 609                     | 6.8                                  | 20.8                                       |
| 4 STIs  | 93                     | 372                     | 3.1                                  | 12.7                                       |
| ≥5 STIs | 96                     | 568                     | 3.2                                  | 19.4                                       |
| Total   | 2981                   | 2928                    | 100                                  | 100                                        |

**eTable 4. Characteristics at Enrollment Among Participants With Preenrollment Testing Data vs Participants With no Preenrollment Testing Data**

|                                                                                                                                                                  | <b>Pre-enrolment<br/>STI data<br/>available<br/>(n=1,378)</b> | <b>No pre-<br/>enrolment STI<br/>data available<br/>(n=1,603)</b> | <b>P<br/>Value*</b> |
|------------------------------------------------------------------------------------------------------------------------------------------------------------------|---------------------------------------------------------------|-------------------------------------------------------------------|---------------------|
| <b>Age<br/>(mean years)</b>                                                                                                                                      | 39.0                                                          | 33.8                                                              | <b>&lt;0.001</b>    |
| <b>Aboriginal or Torres Strait Islander<br/>n(%)</b>                                                                                                             | 6 (0.4)                                                       | 2 (0.2)                                                           | 0.228               |
| <b>Injection drug use at enrolment<br/>n(%)</b>                                                                                                                  | 59 (3.7)                                                      | 90 (6.5)                                                          | <b>&lt;0.001</b>    |
| <b>Enrolment risk criteria. In the last 3 months;<br/>n(%)</b>                                                                                                   |                                                               |                                                                   |                     |
| A regular sexual partner who is an HIV-infected man (not on treatment and/or with detectable viral load), with whom condoms were not consistently used           | 67 (4.9)                                                      | 62 (3.9)                                                          | 0.183               |
| Any receptive CLAI (condomless anal intercourse) with a casual male partner of HIV-positive or unknown status                                                    | 663 (48.1)                                                    | 772 (48.2)                                                        | 0.980               |
| Been diagnosed with rectal gonorrhoea, rectal chlamydia or infectious syphilis                                                                                   | 219 (15.9)                                                    | 265 (16.5)                                                        | 0.637               |
| Used methamphetamines                                                                                                                                            | 226 (16.4)                                                    | 186 (11.6)                                                        | <b>&lt;0.001</b>    |
| More than one episode of anal intercourse when correct and consistent condom use was not achieved (e.g., condom slipped off or broke)                            | 425 (30.8)                                                    | 493 (30.8)                                                        | 0.959               |
| More than one episode of insertive CLAI where the serostatus of their partner was not known, or the partner was HIV positive and not on antiretroviral treatment | 553 (40.1)                                                    | 493 (30.8)                                                        | <b>&lt;0.001</b>    |

**\*P Value is from two-sided t-test of means for age and test of proportions for all other characteristics.**

**eTable 5. Characteristics at Enrolment of PrEP-Experienced vs PrEP-Naive Participants**

|                                                                                                                                                                  | <b>PrEP-experienced participants (n=541)</b> | <b>PrEP-naïve participants (n=837)</b> | <b>P Value*</b>  |
|------------------------------------------------------------------------------------------------------------------------------------------------------------------|----------------------------------------------|----------------------------------------|------------------|
| <b>Age (mean years)</b>                                                                                                                                          | 39.3                                         | 38.9                                   | 0.362            |
| <b>Aboriginal or Torres Strait Islander n(%)</b>                                                                                                                 | 0 (0.0)                                      | 2 (0.2)                                | 0.255            |
| <b>Injection drug use at enrolment n(%)</b>                                                                                                                      | 36 (6.7)                                     | 54 (6.5)                               | 0.882            |
| <b>Enrolment risk criteria. In the last 3 months; n(%)</b>                                                                                                       |                                              |                                        |                  |
| A regular sexual partner who is an HIV-infected man (not on treatment and/or with detectable viral load), with whom condoms were not consistently used           | 34 (6.3)                                     | 33 (3.9)                               | <b>0.048</b>     |
| Any receptive CLAI (condomless anal intercourse) with a casual male partner of HIV-positive or unknown status                                                    | 324 (59.9)                                   | 340 (40.6)                             | <b>&lt;0.001</b> |
| Been diagnosed with rectal gonorrhoea, rectal chlamydia or infectious syphilis                                                                                   | 104 (19.2)                                   | 115 (13.7)                             | <b>0.007</b>     |
| Used methamphetamines                                                                                                                                            | 96 (17.7)                                    | 130 (15.5)                             | 0.279            |
| More than one episode of anal intercourse when correct and consistent condom use was not achieved (e.g., condom slipped off or broke)                            | 153 (28.3)                                   | 273 (32.6)                             | 0.089            |
| More than one episode of insertive CLAI where the serostatus of their partner was not known, or the partner was HIV positive and not on antiretroviral treatment | 254 (47.0)                                   | 300 (35.8)                             | <b>&lt;0.001</b> |

**\*P Value is from two-sided t-test of means for age and test of proportions for all other characteristics.**

**eTable 6. Number of Tests Performed and Positive Tests Among Participants With Preenrollment Testing Data Before and During Study Follow-up (n=1378)**

| Type of test          | 1 year prior to enrolment |                 | During study follow-up (median 14 months) |                 |
|-----------------------|---------------------------|-----------------|-------------------------------------------|-----------------|
|                       | Number performed          | Number positive | Number performed                          | Number positive |
| Rectal chlamydia      | 3759                      | 315             | 5950                                      | 518             |
| Pharyngeal chlamydia  | 3198                      | 26              | 5122                                      | 55              |
| Urethral chlamydia    | 4089                      | 124             | 6396                                      | 206             |
| Rectal gonorrhoea     | 3776                      | 228             | 5968                                      | 356             |
| Pharyngeal gonorrhoea | 3957                      | 172             | 6203                                      | 267             |
| Urethral gonorrhoea   | 4102                      | 65              | 6418                                      | 123             |
| Syphilis serology     | 4129                      | 87              | 6124                                      | 130             |



**eTable 7. Incidence of Sexually Transmitted Infections Before and After Enrollment Among All Participants With Preenrollment Testing Data (n=1378)**

| Outcome               | All participants (n=1,378)               |                 |                    |            |                    |            |
|-----------------------|------------------------------------------|-----------------|--------------------|------------|--------------------|------------|
|                       | Incidence rate<br>(per 100 person-years) |                 | IRR (95% CI)       | P<br>Value | AIRR* (95% CI)     | P<br>Value |
|                       | One year before<br>enrolment             | During<br>PrEPX |                    |            |                    |            |
| Any STI               | 69.5                                     | 98.4            | 1.41 (1.29 – 1.56) | <0.001     | 1.12 (1.02 – 1.23) | 0.015      |
| Chlamydia             | 33.3                                     | 49.0            | 1.47 (1.30 – 1.66) | <0.001     | 1.17 (1.04 – 1.33) | 0.012      |
| Rectal                | 26.1                                     | 37.1            | 1.42 (1.23 – 1.64) | <0.001     | 1.06 (0.92 – 1.23) | 0.404      |
| Urethral              | 9.8                                      | 14.0            | 1.43 (1.14 – 1.81) | 0.002      | 1.12 (0.88 – 1.43) | 0.357      |
| Pharyngeal            | 2.6                                      | 4.6             | 1.78 (1.12 – 2.82) | 0.015      | 1.53 (0.94 – 2.49) | 0.085      |
| Gonorrhea             | 30.6                                     | 42.3            | 1.38 (1.22 – 1.57) | <0.001     | 1.05 (0.93 – 1.19) | 0.440      |
| Rectal                | 18.9                                     | 25.4            | 1.35 (1.14 – 1.59) | <0.001     | 0.98 (0.82 – 1.16) | 0.790      |
| Urethral              | 5.1                                      | 8.3             | 1.63 (1.21– 2.20)  | 0.001      | 1.23 (0.92 – 1.65) | 0.165      |
| Pharyngeal            | 13.9                                     | 18.5            | 1.33 (1.11 – 1.61) | 0.003      | 1.04 (0.86 – 1.26) | 0.669      |
| Syphilis              | 8.7                                      | 6.8             | 1.28 (0.98 – 1.68) | 0.065      | 1.08 (0.82 – 1.42) | 0.599      |
| Rectal infections     | 45.0                                     | 62.3            | 1.39 (1.22 – 1.57) | <0.001     | 1.01 (0.89 – 1.15) | 0.829      |
| Urethral infections   | 15.1                                     | 22.3            | 1.48 (1.23 – 1.79) | <0.001     | 1.11 (0.92 – 1.35) | 0.259      |
| Pharyngeal infections | 16.3                                     | 23.3            | 1.43 (1.20 – 1.70) | <0.001     | 1.08 (0.90 – 1.30) | 0.406      |

Abbreviations: IR, incidence rate per 100 person-years; CI, confidence interval; IRR, incidence rate ratio; AIRR, adjusted incidence rate ratio; STI, sexually transmitted infection.

Only participants with a test result for each specific STI and site in the year prior to enrolment contributed to that outcome.

Participants could contribute multiple diagnoses in each period (before enrolment and during follow-up).

AIRRs were calculated using negative binomial regression with robust standard errors clustered by participant.

\*Adjusted for change in individual testing frequency between before enrolment and during follow-up
